# Supplementary material for: Multiple Myeloma DREAM Challenge reveals epigenetic regulator PHF19 as marker of aggressive disease
Source: Springer Nature journal article supplement (doi:10.1038/s41375-020-0742-z), 2020-02-14

A

## GIS Feature Importance

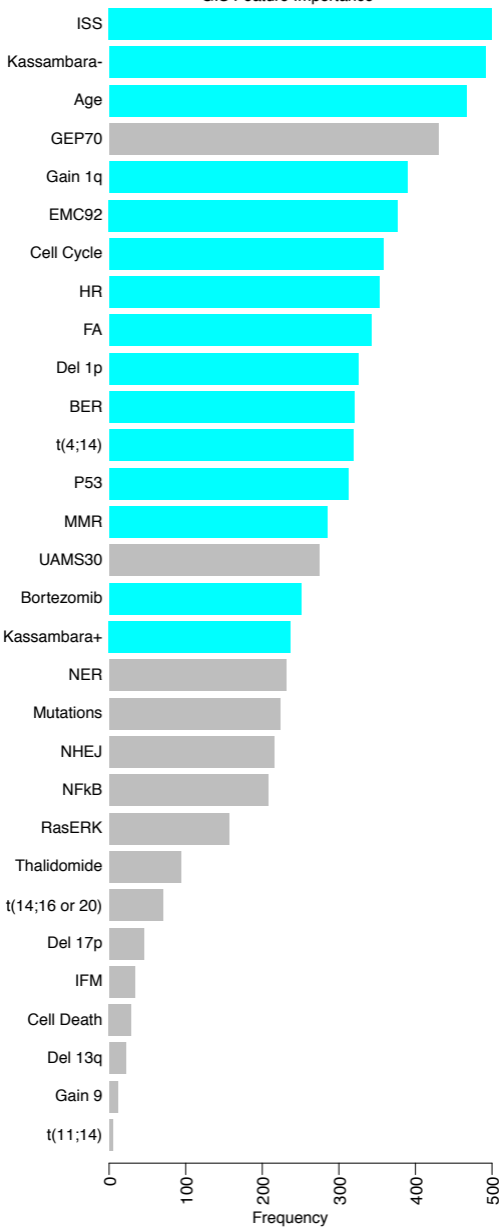

Supplement: MOESM2 [file 41375_2020_742_MOESM2_ESM.pdf › 41375_2020_742_MOESM2_ESM.pdf]
