# Supplementary material for: Multiple Myeloma DREAM Challenge reveals epigenetic regulator PHF19 as marker of aggressive disease
Source: Springer Nature journal article supplement (doi:10.1038/s41375-020-0742-z), 2020-02-14

**Number of drivers**  
p-value =  $1.7e-13$

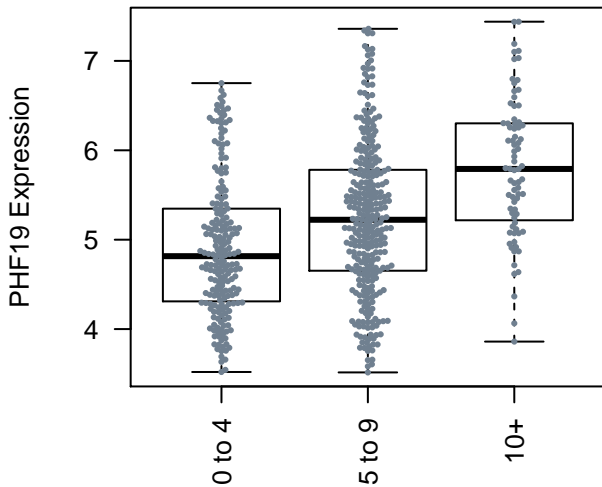

**Translocations**  
p-value =  $7.2e-09$

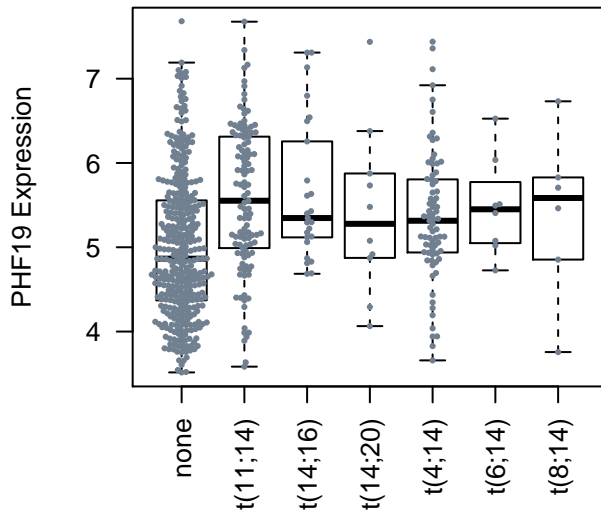

**Hyperdiploid**  
p-value =  $4e-06$

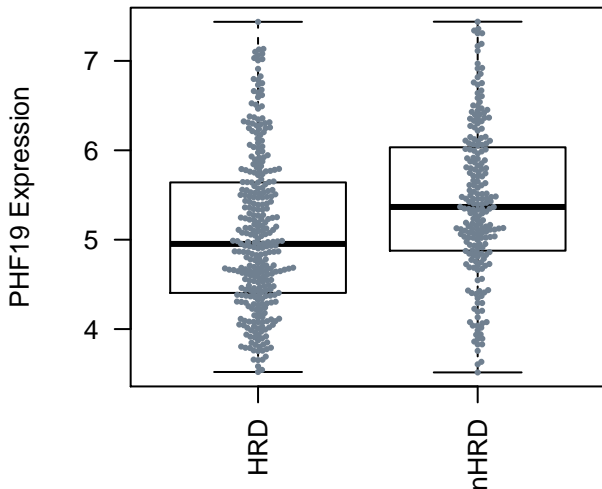

**Nonsynonymous TP53 Mutation**  
p-value =  $2.4e-10$

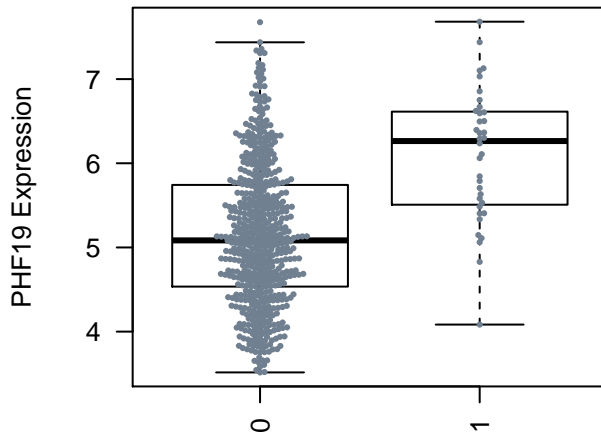

Supplement: MOESM3 [file 41375_2020_742_MOESM3_ESM.pdf › 41375_2020_742_MOESM3_ESM.pdf]
