# Supplementary material for: Multiple Myeloma DREAM Challenge reveals epigenetic regulator PHF19 as marker of aggressive disease
Source: Springer Nature journal article supplement (doi:10.1038/s41375-020-0742-z), 2020-02-14

**DFCI Cor = 0.77**

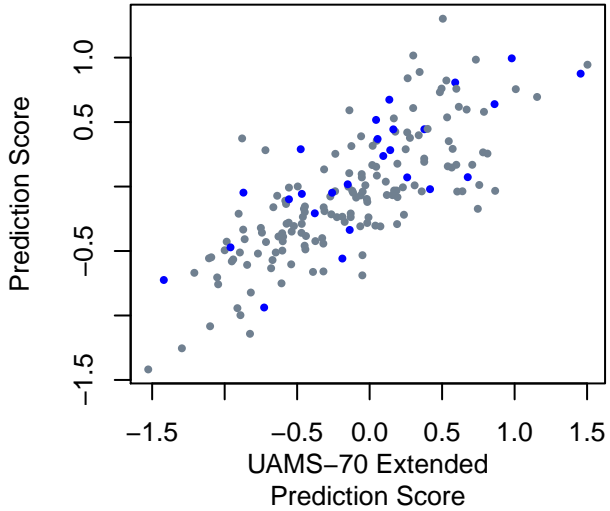

**Heidelberg Cor = 0.88**

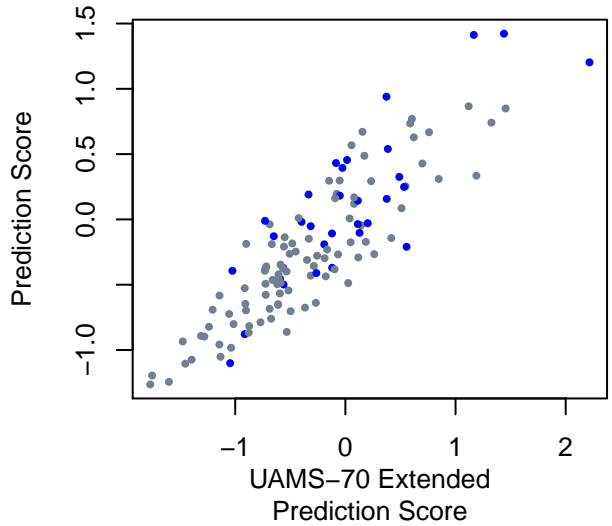

**M2Gen Cor = 0.8**

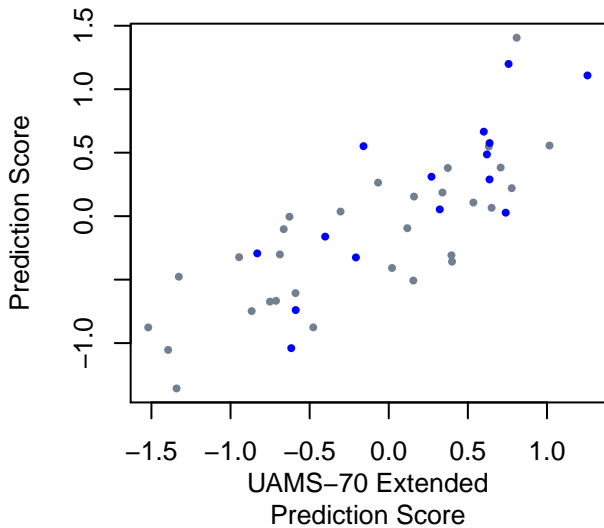

**MRC-IX Cor = 0.88**

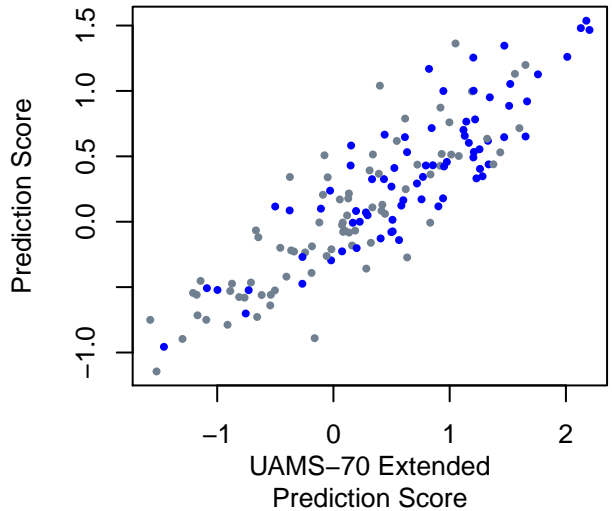

Supplement: MOESM5 [file 41375_2020_742_MOESM5_ESM.pdf › 41375_2020_742_MOESM5_ESM.pdf]
